# Supplementary material for: Integrating Scalable Genome Sequencing Into Microbiology Laboratories for Routine Antimicrobial Resistance Surveillance
Source: Clin Infect Dis. 2021 Nov 25;73(Suppl 4):S258–66. doi: 10.1093/cid/ciab796 (PMC8634525; doi:10.1093/cid/ciab796)
Supplement: ciab796_suppl_Supplementary_Table_2 [file ciab796_suppl_supplementary_table_2.xlsx]

## Sheet: WIJ vignettes
Unit	Theme	Challenges	Solutions / Deterrents
Colombia	Laboratory design
		1) Securing laboratory space: The institute's facilities management model works is that of communal use, guaranteeing equal access to all researchers within the institute.	There was a need for exclusive space for microbiology and molecular methods like PCR and sequencing. An exception request (involving a detailed dossier of activities and projected milestones) was made to the Laboratory Affairs committee to authorize exclusive use of certain labs.
		2) Limitations in laboratory functionality and Institutional restrictions preventing DNA extraction of bacteria collected from human patients.	Materials (labware, reagents and personal protective gear) in the laboratory were designated by colour depending on which part of the WGS process they were being utilized for. Portions of the microbiology and animal health laboratories had to be adapted to accommodate molecular methods (especially bacterial extraction from human sources). Lab space was demarcated into two halves: one for phenotyp…
	Procurement
		1) Lengthy process (up to 2 months) due to stringent institutional due-diligence practices.	Institutional approval lead times were reduced by registering preferred suppliers onto the institute's purchasing portal. Inventory registers were regularly updated to reflect forecasted demand so that all anticipated purchases could be delivered on time.
		2) Higher costs of reagents and labware: Suppliers registered and authorized by the institute were regularly audited and had to maintain certain delivery standards which meant they increased markup on products.	Built a case (through a detailed comparative analysis) to include competitively priced alternatives by ensuring that these suppliers met organization's selection criteria and product specifications. Criteria included but were not limited to: 1) relevance to assay, 2) reliability of dispatch networks, and 3) overall value for money.
	Supply chain & logistics
		1) Longer lead times on imports meant reagents had reduced shelf-life: Door-to-door import (including a lengthy hold at the local intermediaries) took 45-60 days which meant perishable reagents had lost 2 months of shelf-life in transit.	Foreign suppliers were requested to send their most recent stock to minimize the shelf-life reduction, but this was not always fulfilled. During periods of significant delay, reagent stocks belonging to other research groups within the institute were used and replaced as necessary. This was far from ideal for regular sample processing as it was challenging to verify reagent quality.
		2) The institute's inventory system took significantly longer to reflect purchased stock. This, in turn, led to inadequate supply forecasts since the system would display supplies that were finished.	Stocks were verified regularly by hand, alongside a meticulous offline record of reagent batch/lot numbers until the system updated itself.
		3) Restrictions with the National Institute of Health (INS): Governmental regulations meant isolates belonging to the INS could not leave the premises. Hence, bacterial culture and DNA isolation had to be done on-site prompted transport of reagents, labware and small equipment to INS labs across the city. This increased the cost of sample processing for certain bacterial isolates.	Transport containers were prepared with the required amounts of reagents and consumables for a day's activities. These were then moved to the INS site via private taxis to avoid damage and minimize transit time. Detailed expenditure logs were maintained in order to justify these as project costs and to initiate swift reimbursements.
	Equipment maintenance and technical support
		1) Local service providers needed repairs and part replacements to be paid for in advance. However, Agrosavia only would only authorize payments once the issue owner had confirmed a satisfactory level of service and support.	An agreement was struck with the supplier wherein a proof of forthcoming payment would be presented while repair and maintenance were ongoing. This was subject to complete issue resolution.
		2) Delays to preventative maintenance checks as service engineers were not allowed on-site without proper authorization. This was due to a lengthy approval chain with Agrosavia.	Engineers were briefed and accompanied by laboratory managers in compliance with entry requirements to accelerate the induction process. Laboratory staff were able to learn to troubleshoot minor repairs from the regular engineer visits and avoid unwanted call-outs.
		3) Lack of in-depth product knowledge and troubleshooting expertise within the distributor's technical support teams.	Liaised with company headquarters and UK partner hub requesting additional technical expertise
	Training and laboratory protocols
		1) Closure of laboratories due to the SARS-CoV2 pandemic prevented revision and optimization of core protocols like library preparation and sequencing following on-site training.	During the downtime brought about by the pandemic, the laboratory team collectively contributed to creation of a comprehensive WGS protocol manual incorporating SOPs for DNA extraction and QC, library preparation and QC, library normalization and whole-genome sequencing. When on-site access resumed, these SOPs were adjusted and optimized step-by-step to achieve a high-performing workflow.
India	Laboratory design
		1) Expanding laboratory operations to perform high-throughput WGS Microbiology and molecular methods were being performed in close proximity to each other with a significant risk of contamination.	Laboratory spaces were rebuilt from the ground-up and in accordance with the relevant requirements. The new facility also included an exclusive data hub for bioinformatics. Space was not a constraint and therefore, separate enclosures were allocated for microbiology, DNA extraction, library preparation and sequencing. All rooms were fitted with a backup power supply in case of outages.
		2) Lack of support from parent organization with funds to transform the laboratory facility.	Reliance on alternative sources of funds/grants.
	Procurement
		1) Large, initial capex investment in specific WGS-related instrumentation and reagents.	During budget allocation, careful consideration was given not just to the base equipment price, but also 1) add-on accessories, 2) servicing and maintenance costs, 3) recurring consumables, 4) installation and setup costs, 5) automation upgrades.
	Supply chain & logistics
		1) Setting up a sample collection network that represents all Indian states. Critically, many of these sites were collecting organisms without archiving them for retrospective investigations. Ethical clearance was a challenge since the approval and steering committees only convened every 6 months.	An MoU was signed with each collecting institute guaranteeing financial support for isolate revival, metadata collation and sample transport/shipping and archival. This incentivised sites to collect and rapidly transport samples to our central laboratory in Bengaluru. Sites without complex ethical clearance processes were targeted during the initial phases of sampling to ensure a constant feed of…
	Training and laboratory protocols
		1) Revival, resuscitation rate with archived isolates (between 20-70% of total submission per site).	Optimization of steps in the revival process (i.e. innoculating into broth vs agar stabs) and taking forth the highest yielding technique.
		2) Incorrect species identification of referred species.	Due to a lack of archived stocks at the collection sites, only VITEK IDs that correlated with the preliminary result were taken forth for DNA extraction and sequencing.
		3) Optimization of gDNA isolation protocols across several pathogenic species.	The selection of isolates contained both gram (+) and (-) species. In-house optimization was needed to achieve higher stringency of lysis to disrupt the multilayered cellular composition of gram (+) organisms like S. aureus, Enterococcus spp. and Enterobacter spp.
Nigeria	Laboratory design
		1) Space limitations within a multifunctional room housing microbiology and teaching infrastructure and offices.	The floorplan of the lab was changed to enforce a unidirectional flow of people working in it and to segregate dirty sample preparation areas from the pre- and post-PCR operations; amendments were made similar to those described in Supplementary Figure 2.
		2) Ambient temperature and humidity were too high and the existing air conditioning was under stress.	We installed two new airconditioners so that the set of 4 could alternate day and night shifts. Humidity and dust levels still seem to be higher than what the Bioanalyzer might tolerate
		3) Power outages in the lab are common. Power supply is limited and can be shut off for several days during strikes.	We installed a battery-based (inverter) backup system that included solar panels. Power is supplied from the grid when available, this also charges the inverter batteries. When power is shut off, bettery-stored power and solar power provide a continuous supply to the lab.
		4) Even with the electricity backup, switchover outages occur while firing up the back-up system leading to interruptions in instrument runs (like the MiSeq sequencer).	The Miseq was moved to the more regular, reliable freezer backup with an additional UPS added.
		5) Absence of a vibration-free bench for the genome sequencer and none available to procure locally.	We rebuilt a solid platform with concrete blocks. This is sufficiently vibration-resistant for sequencer needs.
	Procurement
		1) Procurement and receipt of the MiSeq sequencer took close to 24 months after the purchase and payment was completed.	Logistical challenges were never resolved as this was the first and only purchase of this type. Our close collaborators, a central government agency (Nigerian CDC) assisted with the import process. Since then, Illumina's local channel partner for Nigeria (and West Africa) has changed.
		2) Procurement processes within our institution are slow, bureaucratic and generally crippled by labor strikes.	Recruitment of a dedicated programme officer to manage procurement paperwork for laboratory investments and HR processes for staff onboarding and communication.
		3) Several pieces of equipment of supplies cannot be sourced locally or are extremely expensive through local channels.	Procured several key Capex and Opex items via Carramore, a supplier offering a robust bespoke supply chain to tackle the import challenges faced by scientists/labs across the African continent. The downsides are the heavy premiums and taxes levied on top of the base purchase prices (>20%) for all goods imported via this channel.
	Supply chain & logistics
		1) Weak and irregular supply chain for sequencing reagents. Additionally, the local Illumina channel partner does not accept local currency payments.	We are informed that AGBL is looking into this (and they are advertizing better services for the continent but this issue remains to be resolved.
		Absence of a stock area.	An inventory room was designated close to the laboratory and a stock management system was introduced
	Equipment maintenance and technical support
		1) On installation, the fragment analyzer (Bioanalyzer 2100) was found to have a defective part. Import and refitting a replacement has taken taken several months to resolve.	Resolution still in progress. Processes downstream of library QC are being on hold due to this delay.
		2) Due to the lack of local technical support, repairs (such as a broken freezer door or a faulty qPCR machine) have had extremely long lead times (in some cases, years).	Since all local enquiries have failed, the lab has contacted Carramore for a swifter solution to the problem, that is now in progress.
	Training and laboratory protocols
		1) Low quality of DNA extractions.	An Internal Process Review (IPR, refer WIJ Roadmap) was performed and the feedback gained from the GHRU Central Hub was implemented to improving the process.
		2) No prior sequencing (WGS) expertise.	Comprehensive Illumina-based NGS process training was provided free-of-charge as part of the upskilling phase during the implementation of bacterial WGS with the GHRU Central Hub.
The Philippines	Laboratory design
		1) Molecular methods within the WGS workflow required separate enclosures/areas for library preparation and sequencing. This meant additional costs as well.	An additional room was identified for these protocols and was retrofitted with furniture to hold all of the new library preparation and sequencing-related equipment.
		2) Vibration, humidity and temperature requirements for the MiSeq sequencer prior to installation.	Illumina's local distributor recommended an anti-vibration table (additional charge) with the purchase of a MiSeq instrument. An extra anti-vibration bench was also ordered to place allied equipment like centrifuges and shakers that produce significant vibration and noise in the lab.
			The laboratory was already fitted with air-conditioning. An extra back-up air-conditioner was installed to ensure uninterrupted temperature regulation within the MiSeq's vicinity (recommended range 18-24°C) since summer temperatures can rise up to 35°C. The clear glass windows for the room were either sealed or tinted to reflect any heat from outside.
		3) Additional electricity load and uninterrupted power during a sequencing run.	Facility engineers were informed of the extra electricity load that would be needed once the MiSeq was fully operational. The sequencing room was therefore connected to the institute's emergency back-up power grid to prevent improper instrument shut down in case of a power outage that might lead to unrecoverable costs and genomic data.
		4) Onboarding of large WGS-specific capital equipment	The width of the MiSeq instrument was too large to bring it in through the narrow door. Instead, a large ground level glass window was carved out and used to transport several pieces of equipment into the room. Once laboratory redesign was complete, the window was sealed permanently.
	Procurement
		1) Lengthy, bureaucratic procurement process (up to 6 months) due to stringent government procurement laws	Due to the multi-layered system of authorization within governmental institutes and labs, early planning and frequent communication of information was key to implementing the laboratory suite within time and budget.
	Supply chain & logistics
		1) Supply of specific reagents and labware for the lab workflow.	The parent company (manufacturer) was contacted to gain access to their local distribution network. To reduce delivery lead time, reagents and labware can be imported especially when financially managed through a project partner who is based in the manufacturer's region. However, this is not always allowable.
		2) No local manufacturer for technical laboratory needs resulting in high cost and long lead times for delivery of equipment, consumables and labware.	Ultimately, the genome sequencing market is highly volume-driven. Larger demand for NGS-related equipment and consumables drives down the cost of purchase and import and this is likely to only be a long-term improvement.
		3) Changing of authorized distributors and local suppliers by the parent company of the brand specific for use in the protocol resulting in change of costs.	Regular market scanning allows for updating of the supplier/vendor registry and price list catalog.
	Equipment maintenance and technical support
		1) Additional cover for lab equipment beyond the warranty period.	Allocated and negotiated all-inclusive annual maintenance packages that covered preventative maintenance checks, regular calibration, repair with parts and labor included and any form of technical support for troubleshooting. The level and quality of maintenance packages varied between regions and also between competing brands of the same equipment. See point 2).
		2) Lack of standardised, high-quality technical support when performing assays.	Due to varying quality of onward training between HQ and the local supplier, technical support with troubleshooting assays can vary between brands. This project created robust relationships between ourselves, our local supplier network and their head offices to negotiate the highest possible level of support.
	Training and laboratory protocols
		1) Due to the late arrival of equipment and consumables, on-site training was limited to the ability to perform certain steps of the WGS process.	Training workshops for all sites were conducted simultaneously at GHRU's UK Central Hub where retrofitted laboratories and experienced instructors were available. This way, trainees were not limited by any incomplete implementation back at their local sites. To combat the long lead times between the first round of training and lab-readiness, refresher courses were delivered by instructors either …
		2) Optimization and adjustment of new protocols as per local set-up and resources.	Laboratory managers (with feedback from their operators) were encouraged to develop detailed SOPs immediately following training in accordance with locally available labware and resources. This minimised the number of refresher modules to be delivered as well as helped with robust protocol versioning and modifications.
